# Supplementary material for: Effects of Sous-Vide on Quality, Structure and Flavor Characteristics of Tilapia Fillets
Source: MDPI journal article supplement (doi:10.3390/molecules28248075), 2023-12-13
Supplement: s1 [file s1]

## Supplementary Material

**Table S1** Description of sensory analysis and assessment scores

| score | Colour and lustre                                                                                          | odor                                              | Taste                                                           | Muscle texture                                                                           |
|-------|------------------------------------------------------------------------------------------------------------|---------------------------------------------------|-----------------------------------------------------------------|------------------------------------------------------------------------------------------|
| 5     | The muscle cuts exhibit a glossy appearance with a normal coloration                                       | With tilapia unique aroma, no fishy odor          | The meat is tender, chewable and palatable                      | High hardness, elastic, finger pressure after the depression disappeared immediately     |
| 4     | The coloration appears to be within the expected range, while the muscle cuts exhibit a glossy appearance. | The characteristic aroma is light, slightly fishy | The meat is tender, chewable and palatability is good           | High hardness, slightly elastic, finger pressure after the depression disappeared faster |
| 3     | Colour a little dull, muscle cuts slightly shiny                                                           | Slightly fishy                                    | The meat is loose, chewability is good, palatability is general | A little hardness, elastic, finger pressure after the depression disappear slightly slow |

|   |                                               |                                    |                                                               |                                                                                                   |
|---|-----------------------------------------------|------------------------------------|---------------------------------------------------------------|---------------------------------------------------------------------------------------------------|
| 2 | Dull in colour, muscle cuts almost lustreless | No aroma, has a heavy fishy smell  | The meat is looser, less chewable and less palatable          | The hardness is low, almost inelastic, and the depression disappears slowly after finger pressure |
|   |                                               | Has a strong fishy or ammonia odor | The meat is loose, with low mastication and poor palatability | No hardness, no elasticity, finger pressure after the depression almost does not disappear        |
| 1 | The color is dull, the muscle section is dull |                                    |                                                               |                                                                                                   |

**Table S2** VOCs detected in tilapia fillets of different cooking methods by HS-GC-IMS.

| Volatile compounds | CAS      | Formula | Molecular weight | RI     | Rt [sec] | Dt [a.u.] | Peak Volume (a.u.)          |                             |
|--------------------|----------|---------|------------------|--------|----------|-----------|-----------------------------|-----------------------------|
|                    |          |         |                  |        |          |           | Sous-vide                   | Control                     |
| Alcohols           |          |         |                  |        |          |           |                             |                             |
| 2-Octanol          | C123966  | C8H18O  | 130.2            | 1027.5 | 387.388  | 1.46986   | 1146.78±16.58 <sup>a</sup>  | 996.44±70.07 <sup>b</sup>   |
| 2-Hexen-1-ol       | C2305217 | C6H12O  | 100.2            | 866.3  | 219.691  | 1.18224   | 2338.23±634.94 <sup>a</sup> | 1313.76±195.17 <sup>b</sup> |
| (R/S)-linalool     | C78706   | C10H18O | 154.3            | 1105.8 | 535.135  | 1.69025   | 3083.36±907.25 <sup>a</sup> | 3095.06±848.85 <sup>a</sup> |

|                                               |           |         |       |        |          |         |                             |                              |
|-----------------------------------------------|-----------|---------|-------|--------|----------|---------|-----------------------------|------------------------------|
| 1-Octen-3-ol                                  | C3391864  | C8H16O  | 128.2 | 990.6  | 333.821  | 1.1706  | 620.45±33.14 <sup>a</sup>   | 573.25±6.68 <sup>b</sup>     |
| <b>Aldehydes</b>                              |           |         |       |        |          |         |                             |                              |
| 2-phenylacetaldehyde (M)                      | C122781   | C8H8O   | 120.2 | 1017.3 | 371.503  | 1.26663 | 2341.83±138.03 <sup>a</sup> | 618.82±273.02 <sup>b</sup>   |
| 2-phenylacetaldehyde (D)                      | C122781   | C8H8O   | 120.2 | 1007.7 | 357.132  | 1.55663 | 1312.43±56.63 <sup>a</sup>  | 508.57±49.72 <sup>b</sup>    |
| (E)-2-Octenal                                 | C2548870  | C8H14O  | 126.2 | 1084   | 489.075  | 1.32519 | 3757.31±34.86 <sup>a</sup>  | 2267.79±441.19 <sup>b</sup>  |
| (E)-2-hexenal                                 | C6728263  | C6H10O  | 98.1  | 906.9  | 247.977  | 1.1957  | 1676.43±25.52 <sup>a</sup>  | 1531.88±33.53 <sup>a</sup>   |
| Hexanal                                       | C66251    | C6H12O  | 100.2 | 789.7  | 179.214  | 1.28669 | 750.23±12.94 <sup>a</sup>   | 1150.36±64.81 <sup>b</sup>   |
| <b>Ketones</b>                                |           |         |       |        |          |         |                             |                              |
| 4-Phenyl-3-buten-2-one                        | C122576   | C10H10O | 146.2 | 1331.3 | 1356.422 | 1.82127 | 3083.36±907.25 <sup>a</sup> | 3095.06±848.85 <sup>a</sup>  |
| Cyclopentanone (M)                            | C120923   | C5H8O   | 84.1  | 803    | 185.664  | 1.33282 | 1317.91±68.45 <sup>a</sup>  | 1091.30±59.73 <sup>a</sup>   |
| Cyclopentanone (D)                            | C120923   | C5H8O   | 84.1  | 803.2  | 185.753  | 1.09584 | 6093.79±167.96 <sup>a</sup> | 2901.20±96.15 <sup>b</sup>   |
| 2-Butanone, 3-hydroxy-                        | C513860   | C4H8O2  | 88.1  | 724.4  | 147.871  | 1.0382  | 475.11±10.56 <sup>a</sup>   | 723.44±77.23 <sup>b</sup>    |
| 3-Pentanone                                   | C96220    | C5H10O  | 86.1  | 687.5  | 132.556  | 1.11364 | 450.49±57.34 <sup>a</sup>   | 494.67±28.41 <sup>a</sup>    |
| 1-Hydroxy-2-propanone                         | C116096   | C3H6O2  | 74.1  | 653.3  | 119.766  | 1.04505 | 5926.76±705.35 <sup>a</sup> | 7216.39±1199.21 <sup>b</sup> |
| 5-Ethyl-4-hydroxy-2-methyl-3(2<br>H)-furanone | C27538096 | C7H10O3 | 142.2 | 1106.2 | 536.091  | 1.33558 | 368.48±1.88 <sup>a</sup>    | 482.60±33.56 <sup>a</sup>    |
| Dimethyldioxolone                             | C37830903 | C5H6O3  | 114.1 | 942.7  | 281.586  | 1.18329 | 1676.43±25.52 <sup>a</sup>  | 1531.88±33.53 <sup>a</sup>   |

|                                |           |          |       |        |          |         |                             |                             |
|--------------------------------|-----------|----------|-------|--------|----------|---------|-----------------------------|-----------------------------|
| Cyclohexen-2-one(D)            | C930687   | C6H8O    | 96.1  | 900.0  | 241.918  | 1.41822 | 5774.54±197.27 <sup>a</sup> | 2652.78±86.66 <sup>b</sup>  |
| Cyclohexen-2-one(M)            | C930687   | C6H8O    | 96.1  | 890.2  | 234.059  | 1.11859 | 111.74±5.46 <sup>a</sup>    | 278.87±29.81 <sup>a</sup>   |
| <b>Esters</b>                  |           |          |       |        |          |         |                             |                             |
| Methyl 2-nonynoate             | C111808   | C10H16O2 | 168.2 | 1271.1 | 1057.899 | 1.48003 | 3278.29±546.75 <sup>a</sup> | 1640.06±458.32 <sup>b</sup> |
| Methyl 2-octynoate             | C111126   | C9H14O2  | 154.2 | 1195.5 | 774.534  | 1.40909 | 1867.83±109.19 <sup>a</sup> | 759.03±105.82 <sup>b</sup>  |
| Methyl salicylate              | C119368   | C8H8O3   | 152.1 | 1181.8 | 732.223  | 1.16124 | 3415.00±227.22 <sup>a</sup> | 1349.97±89.05 <sup>b</sup>  |
| ethyl trans-2-butenolate       | C623701   | C6H10O2  | 114.1 | 847.5  | 208.98   | 1.18395 | 1479.19±17.18 <sup>a</sup>  | 1091.91±3.72 <sup>b</sup>   |
| (Z)-3-hexenyl butyrate         | C16491364 | C10H18O2 | 170.3 | 1184.4 | 739.954  | 1.42843 | 1197.09±160.59 <sup>a</sup> | 1799.47±370.09 <sup>b</sup> |
| ethyl 2-methylpropanoate       | C97621    | C6H12O2  | 116.2 | 750.9  | 159.97   | 1.1911  | 740.51±30.55 <sup>a</sup>   | 579.99±52.29 <sup>a</sup>   |
| gamma-butyrolactone            | C96480    | C4H6O2   | 86.1  | 922.8  | 262.321  | 1.06507 | 618.09±15.47 <sup>a</sup>   | 1047.02±66.55 <sup>b</sup>  |
| <b>S-containing compounds</b>  |           |          |       |        |          |         |                             |                             |
| Dimethyl disulfide             | C624920   | C2H6S2   | 94.2  | 768.8  | 168.717  | 1.13454 | 740.51±30.55 <sup>a</sup>   | 579.98±52.29 <sup>b</sup>   |
| 2-Methylthiophene              | C554143   | C5H6S    | 98.2  | 785.9  | 177.411  | 1.06102 | 1560.78±31.99 <sup>a</sup>  | 1835.96±75.91 <sup>b</sup>  |
| <b>N-containing compounds</b>  |           |          |       |        |          |         |                             |                             |
| 2-Isopropyl-3-methoxy pyrazine | C25773404 | C8H12N2O | 152.2 | 1095.9 | 513.767  | 1.26197 | 4902.16±138.13 <sup>a</sup> | 1940.32±153.17 <sup>b</sup> |
| Pyridine                       | C110861   | C5H5N    | 79.1  | 780.2  | 174.505  | 1.24383 | 3432.7±286.01 <sup>a</sup>  | 3609.7±256.05 <sup>a</sup>  |
| 3-ethylpyridine                | C536787   | C7H9N    | 107.2 | 978.9  | 320.296  | 1.51183 | 2057.46±132.35 <sup>a</sup> | 486.69±22.70 <sup>b</sup>   |

**Others**

|               |          |        |       |        |         |         |                             |                             |
|---------------|----------|--------|-------|--------|---------|---------|-----------------------------|-----------------------------|
| 1,4-Dioxan    | C123911  | C4H8O2 | 88.1  | 747.7  | 158.462 | 1.11359 | 5586.19±583.77 <sup>a</sup> | 7455.20±814.74 <sup>b</sup> |
| Benzoic acid  | C65850   | C7H6O2 | 122.1 | 1229.1 | 889.933 | 1.20995 | 2338.23±634.95 <sup>a</sup> | 1313.76±195.17 <sup>b</sup> |
| 2-Butylfuran  | C4466244 | C8H12O | 124.2 | 893.2  | 236.153 | 1.19585 | 368.48±1.88 <sup>a</sup>    | 482.60±33.56 <sup>a</sup>   |
| 2-Pentylfuran | C3777693 | C9H14O | 138.2 | 981.3  | 322.983 | 1.25623 | 3410.78±82.50 <sup>a</sup>  | 1807.21±36.82 <sup>b</sup>  |

**Unidentified**

|         |              |   |   |       |         |         |                              |                             |
|---------|--------------|---|---|-------|---------|---------|------------------------------|-----------------------------|
| ID_nnnn | unidentified | * | 0 | 1202  | 795.689 | 1.67553 | 2573.47±1505.21 <sup>a</sup> | 2046.52±961.95 <sup>b</sup> |
| ID_nnnn | unidentified | * | 0 | 824.2 | 196.417 | 1.17146 | 252.98±32.49 <sup>a</sup>    | 226.17±27.23 <sup>a</sup>   |

---

Note: Different superscript letters within the same row indicate significant differences among samples ( $p < 0.05$ )
